# Supplementary material for: Post-infectious and post-acute sequelae of critically ill adults with COVID-19
Source: PubMed Central journal article supplement (PMC8211258; doi:10.1371/journal.pone.0252763), 2021-06-17
Supplement: pone.0252763.s001.pdf [file pone.0252763.s001.pdf]

**S1 Table. Characteristics of adult patients transferred from critical care units to general medical ward**

|                                             | No. (%)            |                       |                      |
|---------------------------------------------|--------------------|-----------------------|----------------------|
|                                             | All adults (N= 71) | HDU admission (n= 33) | ICU admission (n=38) |
| <b>Age, mean, years</b>                     |                    |                       |                      |
| <50                                         | 38 (54 %)          | 15 (45.5%)            | 23 (60.5%)           |
| ≥50                                         | 33 (46%)           | 18 (54.5%)            | 15 (39.5%)           |
| <b>Sex</b>                                  |                    |                       |                      |
| Male                                        | 68 (95.8%)         | 32 (97.0%)            | 36 (94.7%)           |
| Female                                      | 3 (4.2%)           | 1 (3.0%)              | 2 (5.3%)             |
| <b>Ethnicity<sup>a</sup></b>                |                    |                       |                      |
| Arab                                        | 6 (8.4%)           | 4 (12.1%)             | 2 (5.3%)             |
| African                                     | 2 (2.8%)           | 0 (0%)                | 2 (5.3%)             |
| South Asian                                 | 54 (76.1%)         | 23(69.7%)             | 31 (81.6%)           |
| Southeast Asian                             | 9 (12.7%)          | 6 (18.2%)             | 3 (7.9%)             |
| <b>Comorbidities<sup>b</sup></b>            |                    |                       |                      |
| No comorbidities                            | 28 (39.4%)         | 12 (36.4%)            | 16 (42.1%)           |
| Asthma or COPD                              | 4 (5.6%)           | 1 (3.0%)              | 3 (7.9%)             |
| Hypertension                                | 14 (19.7%)         | 8 (24.2%)             | 6 (15.8%)            |
| Diabetes                                    | 22 (31.0%)         | 11 (33.3%)            | 11 (28.9%)           |
| Chronic Kidney Disease                      | 1 (1.4%)           | 1 (3.0%)              | 0 (0%)               |
| Immunosuppression <sup>c</sup>              | 2 (2.8%)           | 1 (3.0%)              | 1 (2.6%)             |
| Malignancy <sup>d</sup>                     | 2 (2.8%)           | 1 (3.0%)              | 1 (2.6%)             |
| Obesity (BMI ≥30) <sup>e</sup>              | 18 (25.4%)         | 11 (33.3%)            | 7 (18.4%)            |
| <b>Highest level of respiratory support</b> |                    |                       |                      |
| Nasal cannula/face mask                     | 6 (8.4%)           | 6 (18.2%)             | 0 (0%)               |
| High-flow oxygen                            | 17 (23.9%)         | 15 (45.5%)            | 2 (5.3%)             |
| Noninvasive ventilation                     | 15 (21.1%)         | 12 (36.4%)            | 3 (7.9%)             |
| Invasive/mechanical ventilation             | 33 (46.8%)         | 0 (0%)                | 33 (86.8%)           |

## Footnotes Table 1

Abbreviations: HDU, high dependency unit; ICU, intensive care unit; COPD, chronic obstructive pulmonary disease; BMI, body mass index

<sup>a</sup>Race and ethnicity data were collected from UAE national identification cards located in the electronic medical record.

<sup>b</sup>Comorbidities listed here are defined as medical diagnoses included in medical history by ICD-10 coding.

<sup>c</sup>Immunosuppression include HIV, history solid organ transplant or autoimmune disease.

<sup>d</sup>Malignancy includes active solid organ or hematologic malignancy (not in remission) or receiving active chemotherapy.

<sup>e</sup>Obesity was defined as  $BMI \geq 30$ . Body mass index is calculated as weight in kilograms divided by height in meters squared.
