# Supplementary material for: Post-infectious and post-acute sequelae of critically ill adults with COVID-19
Source: PubMed Central journal article supplement (PMC8211258; doi:10.1371/journal.pone.0252763), 2021-06-17
Supplement: pone.0252763.s002.pdf [file pone.0252763.s002.pdf]

**S2 Table. Demographics of patients transferred from critical care units to general**

|                                      | No. (%)            |                                  | p Value         |
|--------------------------------------|--------------------|----------------------------------|-----------------|
|                                      | Discharged (N= 71) | All ICU/ HDU admissions (N= 669) |                 |
| <b>Age, mean, years</b>              |                    |                                  |                 |
| <b>&lt;50</b>                        | 38 (54%)           | 368 (55%)                        | 0.90            |
| <b>≥50</b>                           | 33 (46%)           | 301 (45%)                        | 0.90            |
| <b>Sex</b>                           |                    |                                  |                 |
| <b>Male</b>                          | 68 (95.8%)         | 589 (88.0%)                      | <b>&lt;0.05</b> |
| <b>Female</b>                        | 3 (4.2%)           | 80 (12.0%)                       | <b>&lt;0.05</b> |
| <b>Comorbidities<sup>a</sup></b>     |                    |                                  |                 |
| <b>No comorbidities</b>              | 28 (39.4%)         | 320 (47.8%)                      | 0.21            |
| <b>Asthma or COPD</b>                | 4 (5.6%)           | 6 (0.8%)                         | <b>&lt;0.05</b> |
| <b>Hypertension</b>                  | 14 (19.7%)         | 211 (30.2%)                      | <b>&lt;0.05</b> |
| <b>Diabetes</b>                      | 22 (31.0%)         | 230 (34.4%)                      | 0.60            |
| <b>Chronic Kidney Disease</b>        | 1 (1.4%)           | 22 (3.3%)                        | 0.71            |
| <b>Immunosuppression<sup>b</sup></b> | 2 (2.8%)           | 10 (1.5%)                        | 0.32            |
| <b>Malignancy<sup>c</sup></b>        | 2 (2.8%)           | 10 (1.5%)                        | 0.32            |
| <b>Obesity (BMI ≥30)<sup>d</sup></b> | 18 (25.4%)         | 170 (25.4%)                      | 1.00            |

medical ward and all COVID-19 critical care patients

### Footnotes Table 2

Abbreviations: HDU, high dependency unit; ICU, intensive care unit; COPD, chronic obstructive pulmonary disease; BMI, body mass index

<sup>a</sup>Comorbidities listed here are defined as medical diagnoses included in medical history by ICD-10 coding.

<sup>b</sup>Immunosuppression include HIV, history solid organ transplant or autoimmune disease.

<sup>c</sup>Malignancy includes active solid organ or hematologic malignancy (not in remission) or receiving active chemotherapy.

<sup>d</sup>Obesity was defined as  $\text{BMI} \geq 30$ . Body mass index is calculated as weight in kilograms divided by height in meters squared.
