# Supplementary material for: Post-infectious and post-acute sequelae of critically ill adults with COVID-19
Source: PubMed Central journal article supplement (PMC8211258; doi:10.1371/journal.pone.0252763), 2021-06-17
Supplement: pone.0252763.s003.pdf [file pone.0252763.s003.pdf]

**S3 Table. Comparison of characteristics of COVID-19 survivors and deaths**

|                                      | No. (%)                 |                | p Value         |
|--------------------------------------|-------------------------|----------------|-----------------|
|                                      | Survivor Cohort (N= 71) | Deaths (N= 41) |                 |
| <b>Age, mean, years</b>              |                         |                | <b>&lt;0.02</b> |
| <50                                  | 38 (54%)                | 12 (29.3%)     |                 |
| ≥50                                  | 33 (46%)                | 29 (70.7%)     |                 |
| <b>Sex</b>                           |                         |                | 0.26            |
| <b>Male</b>                          | 68 (95.8%)              | 37 (90.2%)     |                 |
| <b>Female</b>                        | 3 (4.2%)                | 4 (9.8%)       |                 |
| <b>Comorbidities<sup>a</sup></b>     |                         |                |                 |
| <b>No comorbidities</b>              | 28 (39.4%)              | 6 (14.6%)      | <b>&lt;0.05</b> |
| <b>Asthma or COPD</b>                | 4 (5.6%)                | 3 (7.3%)       | 0.71            |
| <b>Hypertension</b>                  | 14 (19.7%)              | 14 (34.1%)     | 0.11            |
| <b>Diabetes</b>                      | 22 (31.0%)              | 14 (34.1%)     | 0.83            |
| <b>Chronic Kidney Disease</b>        | 1 (1.4%)                | 1 (2.4%)       | 1.00            |
| <b>Immunosuppression<sup>b</sup></b> | 2 (2.8%)                | 0 (0%)         | 0.53            |
| <b>Malignancy<sup>c</sup></b>        | 2 (2.8%)                | 1 (2.4%)       | 1.00            |
| <b>Obesity (BMI ≥30)<sup>e</sup></b> | 18 (25.4%)              | 12 (29.3%)     | 0.66            |

**Footnotes Table 3**

Abbreviations: HDU, high dependency unit; ICU, intensive care unit; COPD, chronic obstructive pulmonary disease; BMI, body mass index

<sup>a</sup>Comorbidities listed here are defined as medical diagnoses included in medical history by ICD-10 coding.

<sup>b</sup>Immunosuppression include HIV, history solid organ transplant or autoimmune disease.

<sup>c</sup>Malignancy includes active solid organ or hematologic malignancy (not in remission) or receiving active chemotherapy.

<sup>d</sup>Obesity was defined as BMI ≥ 30. Body mass index is calculated as weight in kilograms divided by

height in meters squared.
