# Supplementary material for: Post-infectious and post-acute sequelae of critically ill adults with COVID-19
Source: PubMed Central journal article supplement (PMC8211258; doi:10.1371/journal.pone.0252763), 2021-06-17
Supplement: pone.0252763.s004.pdf [file pone.0252763.s004.pdf]

**S4 Table. Post-infectious and post-acute complications of COVID-19 patients transferred out of critical care units**

| Clinical Outcome                                   | No. (%)            |                       |                       |
|----------------------------------------------------|--------------------|-----------------------|-----------------------|
|                                                    | All adults (N= 71) | HDU admission (n= 33) | ICU admission (n= 38) |
| <b>Length of stay<sup>a</sup>, mean, days (SD)</b> | 12.4 (5.29)        | 13.4 (4.53)           | 12.3 (5.29)           |
| <b>Renal</b>                                       | 68 (95.8%)         |                       |                       |
| Electrolytes Imbalance                             | 49 (69.0%)         | 14 (42.4%)            | 35 (92.1%)            |
| Acute Kidney Injury <sup>b</sup>                   | 11 (15.5%)         | 2 (6.1%)              | 9 (23.7%)             |
| Renal Replacement Therapy                          | 8 (11.3%)          | 0 (0.0%)              | 8 (21.1%)             |
| <b>Hepatic</b>                                     |                    |                       |                       |
| Acute Hepatic Injury <sup>c</sup>                  | 11 (15.5%)         | 6 (18.2%)             | 5 (13.2%)             |
| <b>Cardiac</b>                                     |                    |                       |                       |
| Acute Cardiac Injury <sup>d</sup>                  | 1 (1.4%)           | 0 (0.0%)              | 1 (2.6%)              |
| <b>Pulmonary</b>                                   |                    |                       |                       |
| Post-acute supplemental oxygen                     | 48 (67.6%)         | 22 (66.7%)            | 26 (68.4%)            |
| <b>Hematologic</b>                                 |                    |                       |                       |
| VTE                                                | 1 (1.4%)           | 0 (0.0%)              | 1 (2.6%)              |
| <b>Musculoskeletal</b>                             | 44 (62.0%)         |                       |                       |
| Myopathy <sup>e</sup> /muscle weakness             | 22 (31.0%)         | 1 (3.0%)              | 21 (55.3%)            |
| Pressure ulcer/wound                               | 22 (31.0%)         | 1 (3.0%)              | 21 (55.3%)            |
| <b>Neurologic</b>                                  | 39 (54.9%)         |                       |                       |
| Delirium/confusion <sup>f</sup>                    | 13 (18.3%)         | 0 (0.0%)              | 13 (34.2%)            |
| Ataxia/gait imbalance                              | 4 (5.6%)           | 0 (0.0%)              | 4 (10.5%)             |
| Swallowing impairment                              | 22 (31.0%)         | 1 (3.0%)              | 21 (55.3%)            |

**Footnotes Table 4**

Abbreviations: HDU, high dependency unit; ICU, intensive care unit; SD, standard deviation; VTE, venous thromboembolism

<sup>a</sup>Length of stay begins with admission time and ends with discharge time, days

<sup>b</sup>Acute kidney injury was identified as an increase in serum creatinine by  $\geq 0.3$ mg/dL ( $\geq 26.5$  mol/L) within 48 hours or an increase in serum creatinine to  $\geq 1.5$  times baseline within the prior 7 days compared with the preceding 1 year of data in acute care medical records. Acute kidney injury is calculated only for patients with record of baseline kidney function data available and without a

diagnosis of end-stage kidney disease.
